# Supplementary material for: A ditopic calix[4]pyrrole amide derivative: highlighting the importance of fundamental studies and the use of NaPh4B as additive in the design and applications of mercury(ii) ion selective electrodes
Source: Royal Society of Chemistry journal article supplement (doi:10.1039/c5ta02215k), 2015-01-01
Supplement: c5ta02215k1.pdf [file c5ta02215k1.pdf]

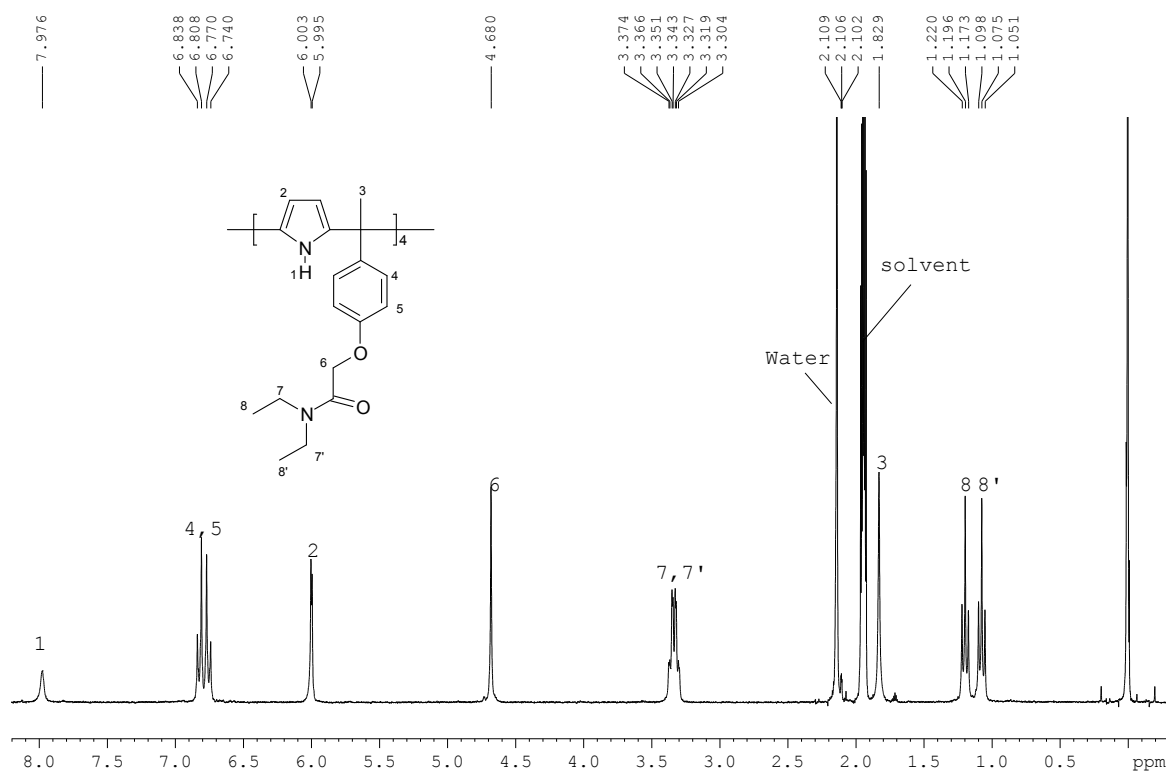

**Fig a** <sup>1</sup>H NMR of CPA in CD<sub>3</sub>CN at 298.15 K

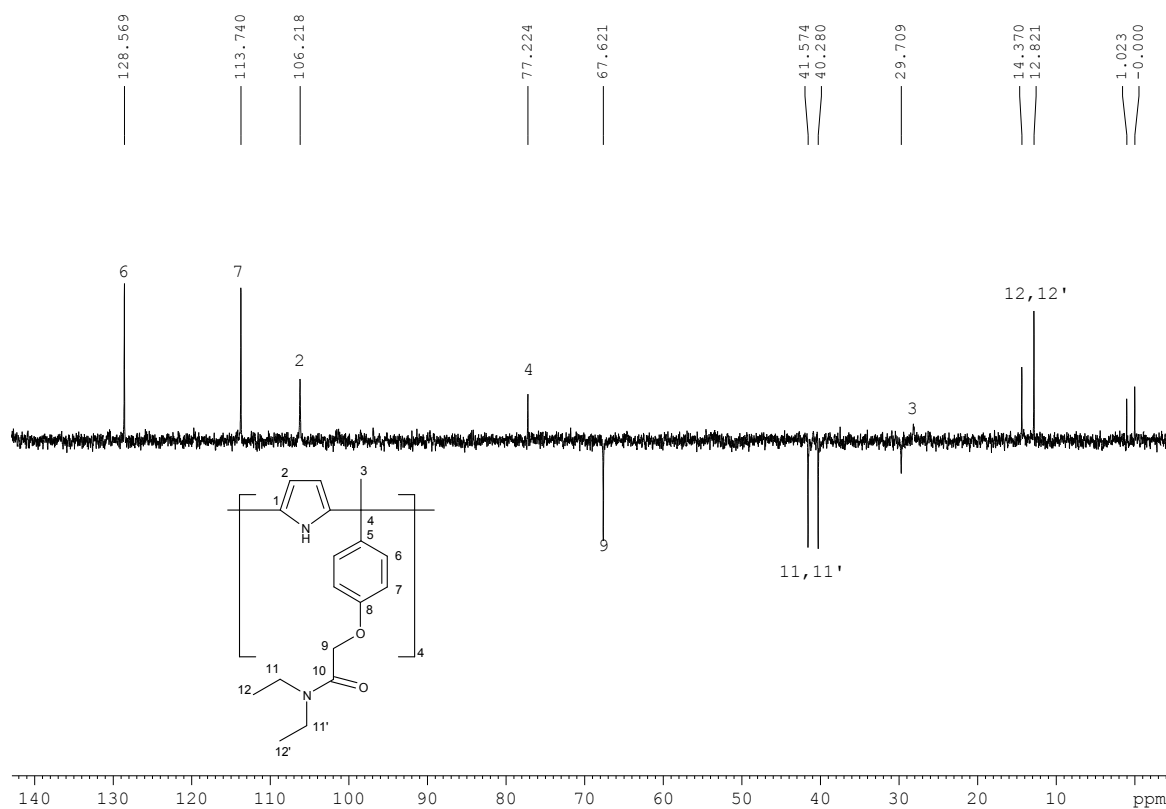

**Fig b**  $^{13}\text{C}$  NMR-DEPT spectrum of CPA in  $\text{CDCl}_3$  at 298.15 K

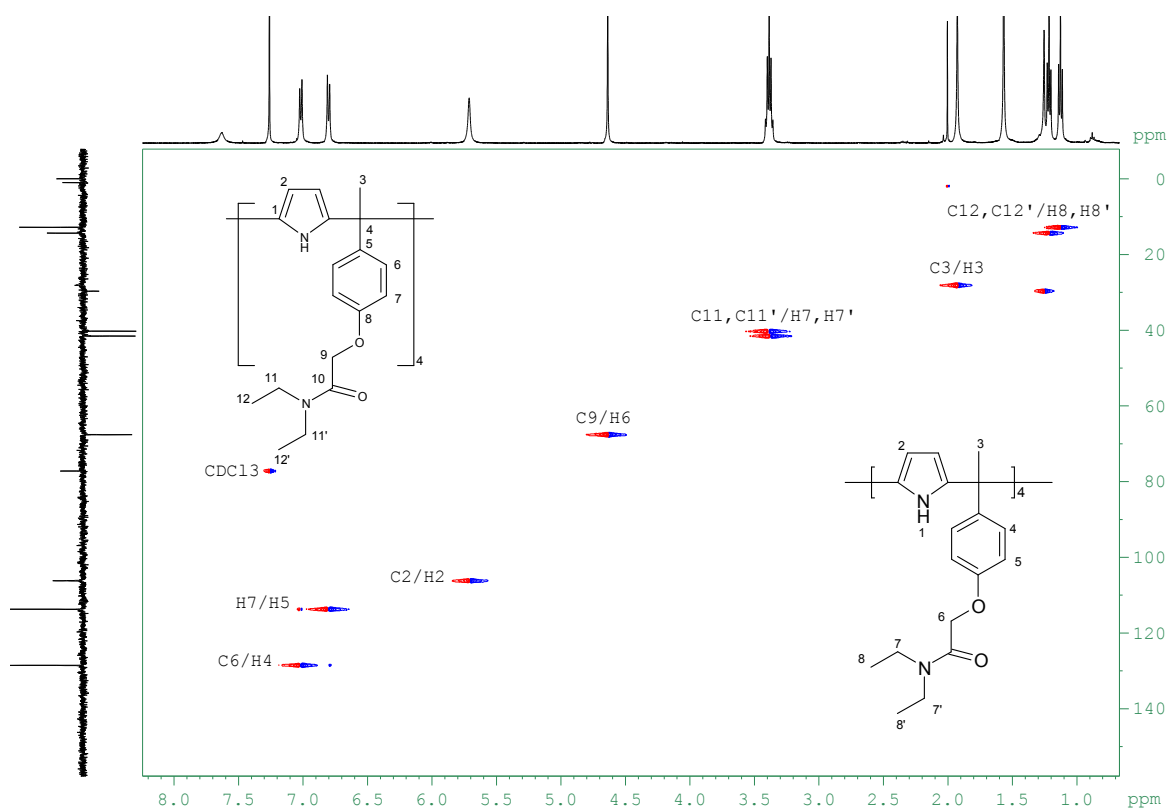

**Fig c** HMQC NMR of CPA in  $\text{CDCl}_3$  at 298.15 K
